# Supplementary material for: Diffuse PRAME Expression Is Highly Specific for Thin Melanomas in the Distinction from Severely Dysplastic Nevi but Does Not Distinguish Metastasizing from Non-Metastasizing Thin Melanomas
Source: MDPI journal article supplement (doi:10.3390/cancers13153864), 2021-07-31
Supplement: s1 [file s1]

# Supplementary Material: Diffuse PRAME expression is highly specific for thin melanomas in the distinction from severely dysplastic nevi but does not distinguish metastasizing from non-metastasizing thin melanomas.

Maximilian Gassenmaier, Matthias Hahn, Gisela Metzler, Jürgen Bauer, Amir Sadegh Yazdi, Ulrike Keim, Claus Garbe, Nikolaus Benjamin Wagner and Stephan Forchhammer

**Table S1.** Clinicopathologic characteristics of the cases.

| Characteristics                    | Metastasizing<br>Melanoma ( <i>n</i> = 35)<br><i>n</i> (%) | Non-Metastasizing<br>Melanoma ( <i>n</i> = 35)<br><i>n</i> (%) | Severely Dysplastic<br>Compound Nevus ( <i>n</i> = 35)<br><i>n</i> (%) | <i>p</i> -Value<br>MM vs.<br>NMM | <i>p</i> -Value<br>SDN vs.<br>Melanoma |
|------------------------------------|------------------------------------------------------------|----------------------------------------------------------------|------------------------------------------------------------------------|----------------------------------|----------------------------------------|
| Breslow thickness<br>(mean, range) | 0.7 mm (0.3–1.0)                                           | 0.7 mm (0.4–1.0)                                               | n.a.                                                                   | 0.91                             | n.a.                                   |
| Age (mean, range)                  | 62 years (31–91)                                           | 61 years (30–86)                                               | 45 years (20–70)                                                       | 0.95                             | <0.001                                 |
| Gender                             |                                                            |                                                                |                                                                        |                                  |                                        |
| Female                             | 14 (40.0%)                                                 | 14 (40.0%)                                                     | 15 (42.9%)                                                             | 1.0                              | 0.84                                   |
| Male                               | 21 (60.0%)                                                 | 21 (60.0%)                                                     | 20 (57.1%)                                                             |                                  |                                        |
| Site                               |                                                            |                                                                |                                                                        |                                  |                                        |
| Head and neck                      | 10 (28.6%)                                                 | 10 (28.6%)                                                     | 2 (5.7%)                                                               | 1.0                              | 0.005                                  |
| Trunk                              | 14 (11.4%)                                                 | 14 (11.4%)                                                     | 25 (71.4%)                                                             |                                  |                                        |
| Upper extremities                  | 4 (11.4%)                                                  | 4 (11.4%)                                                      | 1 (2.9%)                                                               |                                  |                                        |
| Lower extremities                  | 7 (20%)                                                    | 7 (20%)                                                        | 7 (20%)                                                                |                                  |                                        |
| Subtype                            |                                                            |                                                                |                                                                        |                                  |                                        |
| Superficial spreading              | 25 (71.4%)                                                 | 23 (65.7%)                                                     | n.a.                                                                   | 0.42                             | n.a.                                   |
| Lentigo maligna                    | 6 (17.1%)                                                  | 10 (28.6%)                                                     | n.a.                                                                   |                                  |                                        |
| Acral lentiginous                  | 2 (5.7%)                                                   | 1 (2.9%)                                                       | n.a.                                                                   |                                  |                                        |
| Nevoid                             | 2 (5.7%)                                                   | 0 (0%)                                                         | n.a.                                                                   |                                  |                                        |
| Spitzoid                           | 0 (0%)                                                     | 1 (2.9%)                                                       | n.a.                                                                   |                                  |                                        |
| Regression                         |                                                            |                                                                |                                                                        |                                  |                                        |
| Present                            | 18 (51.4%)                                                 | 15 (42.9%)                                                     | 0 (0%)                                                                 | 0.63                             | <0.001                                 |
| Absent                             | 17 (48.6%)                                                 | 20 (57.1%)                                                     | 35 (100%)                                                              |                                  |                                        |
| Ulceration                         |                                                            |                                                                |                                                                        |                                  |                                        |
| Present                            | 4 (11.4%)                                                  | 2 (5.7%)                                                       | 0 (0%)                                                                 | 0.67                             | 0.18                                   |
| Absent                             | 31 (88.6%)                                                 | 33 (94.3%)                                                     | 35 (100%)                                                              |                                  |                                        |
| Stage                              |                                                            |                                                                |                                                                        |                                  |                                        |
| III                                | 14 (40.0%)                                                 | 0 (0%)                                                         | n.a.                                                                   | <0.001                           | n.a.                                   |
| IV                                 | 21 (60.0%)                                                 | 0 (0%)                                                         | n.a.                                                                   |                                  |                                        |
| Follow-up<br>(mean, range)         | 65 months (5–139)                                          | 99 months (31–153)                                             | 92 months (31–141)                                                     | <0.001                           | 0.23                                   |

Abbreviations: MM, metastasizing melanoma. n.a., not applicable. NMM, non-metastasizing melanoma. SDN, severely dysplastic compound nevus.
